# Supplementary material for: Proteome-Wide Structural Computations Provide Insights into Empirical Amino Acid Substitution Matrices
Source: MDPI journal article supplement (doi:10.3390/ijms24010796), 2023-01-02
Supplement: s1 [file s1]

**Proteome-wide structural computations provide insights into empirical amino acid substitution matrices**

Pablo Aledo and Juan C. Aledo\*

Department of Molecular Biology and Biochemistry, University of Málaga, 29071-Málaga, Spain.

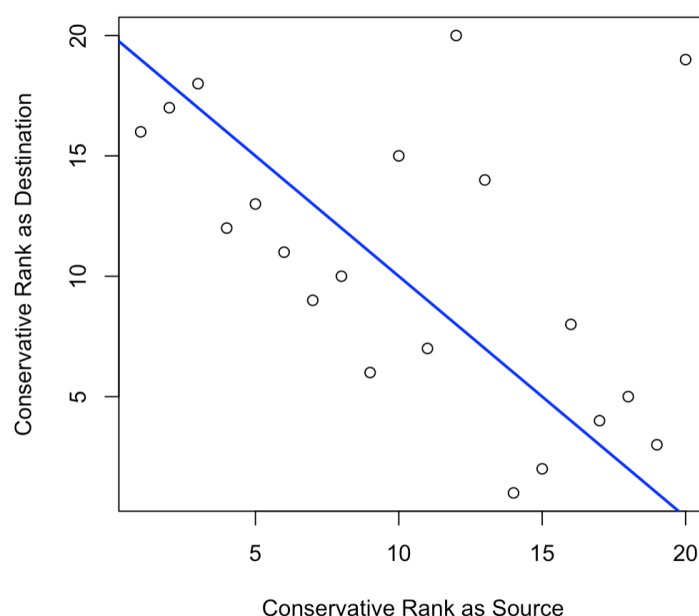

**Fig. S1.** Conservative ranks were computed as follows. Each amino acid, when considered either as source or as destination, received a number from 1 to 20. A value of 1 means this amino acid averages the lowest  $\Delta\Delta G$ . On the contrary, scoring 20 means the more radical source or destination on average, with the highest  $\Delta\Delta G$ . The blue line shows the line for a hypothetical perfect negative correlation of ranks ( $y = -x$ ).

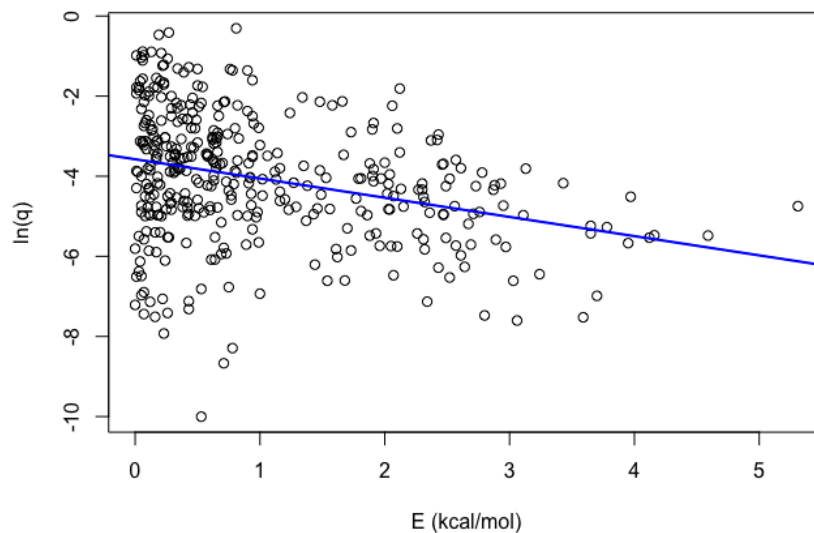

**Fig. S2.** The linearized Arrhenius equation was used to carry out linear regression of  $\ln(q)$  on  $E$ . The dispersion plot for the 380 points and the fitted regression line (in blue) are shown. The R-squared was 0.093 and the p-value =  $1.3 \cdot 10^{-9}$ .

**Table S1.** Site-specific stability changes,  $\Delta\Delta G$ , due to mutations in human proteins.

Values are shown as kcal/mol. The table can be obtained as an Rdata at:

<https://bitbucket.org/jcaledo/qarrhenius/src/master/TableS1.Rda>.

**Table S2.** Extracted features used in supervised learning and predicted values for  $Q_{Arrh}$ .

The table can be obtained as an Rdata at:

<https://bitbucket.org/jcaledo/qarrhenius/src/master/TableS2.Rda>

**Table S3.** Measures of central tendency and dispersion for changes in thermodynamic stability of the amino acid substitutions. N stands for the number of the indicated mutation analyzed. Min and Max provide the range of energies observed. Median, mean and standard deviation (SD) are given in kcal/mol.

| <b>Mutation</b> | <b>N</b> | <b>Min</b> | <b>Median</b> | <b>Mean</b> | <b>Max</b> | <b>SD</b> |
|-----------------|----------|------------|---------------|-------------|------------|-----------|
| A -> R          | 509,804  | -5.23      | -0.12         | 1.88        | 53.88      | 5.22      |
| A -> N          | 509,804  | -3.68      | 0.15          | 0.96        | 20.19      | 2.20      |
| A -> D          | 509,804  | -6.4       | 0.41          | 1.41        | 21.14      | 2.58      |
| A -> C          | 509,804  | -5.53      | 0.32          | 0.50        | 10.32      | 0.86      |
| A -> Q          | 509,804  | -3.32      | -0.07         | 1.12        | 43.38      | 3.02      |
| A -> E          | 509,804  | -6.12      | 0.09          | 1.39        | 42.53      | 3.25      |
| A -> G          | 509,804  | -8.00      | 0.72          | 0.61        | 5.42       | 1.05      |
| A -> H          | 509,804  | -3.36      | 0.25          | 0.96        | 83.98      | 2.40      |
| A -> I          | 509,804  | -4.99      | 0.28          | 1.05        | 41.80      | 2.14      |
| A -> L          | 509,804  | -4.84      | -0.16         | 0.61        | 27.2       | 2.43      |
| A -> K          | 509,804  | -4.72      | -0.15         | 1.28        | 44.96      | 3.69      |
| A -> M          | 509,804  | -5.36      | -0.30         | 0.27        | 33.83      | 2.19      |
| A -> F          | 509,804  | -5.29      | -0.12         | 2.86        | 75.94      | 7.33      |
| A -> P          | 509,804  | -5.67      | 2.43          | 2.26        | 27.40      | 2.49      |
| A -> S          | 509,804  | -3.27      | 0.22          | 0.33        | 9.94       | 0.72      |
| A -> T          | 509,804  | -3.03      | 0.53          | 0.86        | 29.08      | 1.24      |
| A -> W          | 509,804  | -5.10      | 0.04          | 4.74        | 89.77      | 10.99     |
| A -> Y          | 509,804  | -4.78      | -0.05         | 3.61        | 74.28      | 8.71      |
| A -> V          | 509,804  | -4.22      | 0.50          | 0.90        | 34.07      | 1.36      |

| <b>Mutation</b> | <b>N</b> | <b>Min</b> | <b>Median</b> | <b>Mean</b> | <b>Max</b> | <b>SD</b> |
|-----------------|----------|------------|---------------|-------------|------------|-----------|
| R -> A          | 426,630  | -14.79     | 0.66          | 0.85        | 9.77       | 0.94      |
| R -> N          | 426,630  | -8.17      | 0.58          | 0.81        | 14.52      | 1.04      |
| R -> D          | 426,630  | -10.71     | 0.97          | 1.37        | 16.53      | 1.61      |
| R -> C          | 426,630  | -14.93     | 0.82          | 1.01        | 9.41       | 0.88      |
| R -> Q          | 426,630  | -4.93      | 0.33          | 0.58        | 17.89      | 0.93      |
| R -> E          | 426,630  | -7.52      | 0.63          | 0.99        | 17.24      | 1.42      |
| R -> G          | 426,630  | -19.19     | 1.16          | 1.32        | 11.53      | 1.30      |
| R -> H          | 426,630  | -7.24      | 0.66          | 0.77        | 65.80      | 1.13      |
| R -> I          | 426,630  | -6.24      | 0.60          | 0.87        | 35.47      | 1.21      |
| R -> L          | 426,630  | -8.37      | 0.17          | 0.24        | 21.14      | 0.85      |
| R -> K          | 426,630  | -5.39      | 0.13          | 0.29        | 18.23      | 0.72      |
| R -> M          | 426,630  | -9.65      | 0.08          | 0.12        | 14.90      | 0.83      |
| R -> F          | 426,630  | -7.24      | 0.24          | 0.68        | 74.45      | 2.10      |
| R -> P          | 426,630  | -8.11      | 2.88          | 2.75        | 24.31      | 2.42      |
| R -> S          | 426,630  | -14.14     | 0.74          | 0.98        | 11.13      | 1.05      |
| R -> T          | 426,630  | -6.86      | 0.94          | 1.17        | 28.45      | 1.08      |
| R -> W          | 426,630  | -4.66      | 0.43          | 1.03        | 63.13      | 2.57      |

|        |         |       |      |      |       |      |
|--------|---------|-------|------|------|-------|------|
| R -> Y | 426,630 | -7.26 | 0.33 | 0.91 | 56.75 | 2.65 |
| R -> V | 426,630 | -6.32 | 0.93 | 1.18 | 29.68 | 1.07 |

| <b>Mutation</b> | <b>N</b> | <b>Min</b> | <b>Median</b> | <b>Mean</b> | <b>Max</b> | <b>SD</b> |
|-----------------|----------|------------|---------------|-------------|------------|-----------|
| N -> A          | 256,297  | -8.03      | 0.35          | 0.51        | 8.13       | 0.84      |
| N -> R          | 256,297  | -4.52      | -0.06         | 0.44        | 52.45      | 2.16      |
| N -> D          | 256,297  | -6.22      | 0.34          | 0.53        | 12.34      | 1.15      |
| N -> C          | 256,297  | -8.92      | 0.42          | 0.59        | 8.53       | 0.75      |
| N -> Q          | 256,297  | -3.57      | 0.08          | 0.40        | 14.73      | 1.20      |
| N -> E          | 256,297  | -4.31      | 0.25          | 0.59        | 18.14      | 1.42      |
| N -> G          | 256,297  | -15.30     | 0.67          | 0.79        | 9.19       | 1.14      |
| N -> H          | 256,297  | -3.38      | 0.34          | 0.45        | 56.25      | 1.10      |
| N -> I          | 256,297  | -5.50      | 0.40          | 0.77        | 24.29      | 1.47      |
| N -> L          | 256,297  | -6.00      | -0.08         | 0.016       | 19.28      | 1.05      |
| N -> K          | 256,297  | -5.11      | -0.08         | 0.27        | 25.92      | 1.46      |
| N -> M          | 256,297  | -5.30      | -0.17         | -0.08       | 27.40      | 1.10      |
| N -> F          | 256,297  | -5.42      | -0.07         | 0.65        | 63.82      | 3.20      |
| N -> P          | 256,297  | -5.64      | 2.47          | 2.37        | 21.23      | 2.39      |
| N -> S          | 256,297  | -7.22      | 0.39          | 0.61        | 8.13       | 0.91      |
| N -> T          | 256,297  | -5.45      | 0.66          | 0.91        | 18.12      | 1.07      |
| N -> W          | 256,297  | -5.32      | 0.16          | 1.42        | 73.36      | 5.00      |
| N -> Y          | 256,297  | -4.93      | 0.01          | 1.01        | 57.55      | 4.18      |
| N -> V          | 256,297  | -5.57      | 0.69          | 0.97        | 23.16      | 1.19      |

| <b>Mutation</b> | <b>N</b> | <b>Min</b> | <b>Median</b> | <b>Mean</b> | <b>Max</b> | <b>SD</b> |
|-----------------|----------|------------|---------------|-------------|------------|-----------|
| D -> A          | 350,568  | -11.91     | 0.32          | 0.65        | 10.84      | 1.31      |
| D -> R          | 350,568  | -11.15     | 0.12          | 0.73        | 36.83      | 2.30      |
| D -> N          | 350,568  | -9.07      | 0.17          | 0.43        | 10.34      | 1.10      |
| D -> C          | 350,568  | -8.29      | 0.43          | 0.78        | 9.95       | 1.24      |
| D -> Q          | 350,568  | -6.74      | 0.12          | 0.58        | 18.44      | 1.58      |
| D -> E          | 350,568  | -5.16      | 0.07          | 0.43        | 16.68      | 1.24      |
| D -> G          | 350,568  | -15.92     | 0.62          | 0.98        | 11.78      | 1.45      |
| D -> H          | 350,568  | -9.00      | 0.32          | 0.63        | 69.80      | 1.40      |
| D -> I          | 350,568  | -7.67      | 0.43          | 0.84        | 33.69      | 1.63      |
| D -> L          | 350,568  | -7.86      | 0.01          | 0.32        | 25.97      | 1.52      |
| D -> K          | 350,568  | -9.25      | 0.05          | 0.57        | 32.87      | 1.85      |
| D -> M          | 350,568  | -9.00      | -0.07         | 0.17        | 15.89      | 1.49      |
| D -> F          | 350,568  | -8.43      | 0.00          | 0.71        | 54.48      | 2.94      |
| D -> P          | 350,568  | -8.37      | 1.81          | 1.98        | 26.11      | 2.40      |
| D -> S          | 350,568  | -10.20     | 0.42          | 0.77        | 10.94      | 1.30      |
| D -> T          | 350,568  | -7.64      | 0.65          | 1.00        | 21.29      | 1.37      |
| D -> W          | 350,568  | -6.43      | 0.23          | 1.29        | 69.86      | 4.22      |
| D -> Y          | 350,568  | -7.50      | 0.09          | 0.96        | 57.86      | 3.52      |
| D -> V          | 350,568  | -8.49      | 0.69          | 1.04        | 25.03      | 1.44      |

| <b>Mutation</b> | <b>N</b> | <b>Min</b> | <b>Median</b> | <b>Mean</b> | <b>Max</b> | <b>SD</b> |
|-----------------|----------|------------|---------------|-------------|------------|-----------|
| C -> A          | 162,226  | -8.42      | 0.20          | 0.63        | 9.12       | 1.52      |

|        |         |        |       |      |       |       |
|--------|---------|--------|-------|------|-------|-------|
| C -> R | 162,226 | -4.57  | 0.45  | 3.23 | 46.88 | 5.61  |
| C -> N | 162,226 | -3.79  | 0.36  | 1.29 | 25.02 | 2.56  |
| C -> D | 162,226 | -7.54  | 0.89  | 1.86 | 23.12 | 2.92  |
| C -> Q | 162,226 | -4.50  | 0.41  | 1.85 | 28.48 | 3.30  |
| C -> E | 162,226 | -5.17  | 0.78  | 2.16 | 27.51 | 3.41  |
| C -> G | 162,226 | -13.00 | 1.14  | 1.39 | 8.62  | 1.68  |
| C -> H | 162,226 | -3.34  | 0.61  | 1.51 | 87.73 | 2.73  |
| C -> I | 162,226 | -4.28  | 0.31  | 1.26 | 25.04 | 2.80  |
| C -> L | 162,226 | -5.34  | -0.14 | 0.79 | 24.69 | 2.98  |
| C -> K | 162,226 | -5.02  | 0.22  | 2.18 | 36.51 | 4.03  |
| C -> M | 162,226 | -4.91  | -0.28 | 0.53 | 31.52 | 2.81  |
| C -> F | 162,226 | -5.23  | 0.65  | 4.27 | 65.69 | 7.13  |
| C -> P | 162,226 | -4.95  | 2.69  | 2.85 | 25.44 | 2.72  |
| C -> S | 162,226 | -6.71  | 0.54  | 1.11 | 10.43 | 1.82  |
| C -> T | 162,226 | -3.58  | 0.45  | 1.24 | 16.88 | 2.24  |
| C -> W | 162,226 | -5.80  | 1.56  | 7.43 | 77.58 | 11.24 |
| C -> Y | 162,226 | -4.61  | 1.00  | 5.74 | 72.00 | 8.96  |
| C -> V | 162,226 | -3.71  | 0.29  | 0.99 | 18.65 | 2.23  |

| <b>Mutation</b> | <b>N</b> | <b>Min</b> | <b>Median</b> | <b>Mean</b> | <b>Max</b> | <b>SD</b> |
|-----------------|----------|------------|---------------|-------------|------------|-----------|
| Q -> A          | 362,053  | -29.00     | 0.38          | 0.40        | 5.66       | 0.54      |
| Q -> R          | 362,053  | -10.44     | -0.03         | 0.05        | 32.06      | 1.00      |
| Q -> N          | 362,053  | -11.01     | 0.34          | 0.38        | 11.44      | 0.68      |
| Q -> D          | 362,053  | -11.98     | 0.62          | 0.71        | 10.66      | 0.98      |
| Q -> C          | 362,053  | -23.87     | 0.53          | 0.58        | 5.10       | 0.54      |
| Q -> E          | 362,053  | -9.49      | 0.23          | 0.30        | 13.96      | 0.67      |
| Q -> G          | 362,053  | -39.74     | 0.91          | 0.86        | 7.05       | 1.01      |
| Q -> H          | 362,053  | -11.01     | 0.37          | 0.30        | 58.96      | 0.62      |
| Q -> I          | 362,053  | -4.92      | 0.20          | 0.32        | 40.45      | 0.92      |
| Q -> L          | 362,053  | -6.18      | -0.13         | -0.23       | 16.00      | 0.65      |
| Q -> K          | 362,053  | -10.09     | -0.06         | -0.04       | 17.63      | 0.59      |
| Q -> M          | 362,053  | -17.22     | -0.29         | -0.35       | 11.50      | 0.69      |
| Q -> F          | 362,053  | -4.73      | -0.05         | 0.18        | 52.94      | 1.71      |
| Q -> P          | 362,053  | -30.00     | 2.57          | 2.31        | 22.94      | 2.10      |
| Q -> S          | 362,053  | -24.65     | 0.49          | 0.54        | 6.69       | 0.68      |
| Q -> T          | 362,053  | -14.30     | 0.63          | 0.71        | 30.72      | 0.74      |
| Q -> W          | 362,053  | -5.06      | 0.11          | 0.54        | 61.16      | 2.47      |
| Q -> Y          | 362,053  | -4.41      | 0.05          | 0.42        | 52.87      | 2.27      |
| Q -> V          | 362,053  | -14.12     | 0.58          | 0.68        | 33.24      | 0.78      |

| <b>Mutation</b> | <b>N</b> | <b>Min</b> | <b>Median</b> | <b>Mean</b> | <b>Max</b> | <b>SD</b> |
|-----------------|----------|------------|---------------|-------------|------------|-----------|
| E -> A          | 546,081  | -17.42     | 0.29          | 0.39        | 8.16       | 0.74      |
| E -> R          | 546,081  | -8.65      | 0.02          | 0.20        | 40.46      | 1.31      |
| E -> N          | 546,081  | -10.36     | 0.34          | 0.42        | 10.82      | 0.88      |
| E -> D          | 546,081  | -8.85      | 0.43          | 0.47        | 10.98      | 0.78      |
| E -> C          | 546,081  | -15.65     | 0.53          | 0.61        | 8.90       | 0.77      |
| E -> Q          | 546,081  | -7.14      | 0.03          | 0.11        | 13.67      | 0.68      |

|        |         |        |       |       |       |      |
|--------|---------|--------|-------|-------|-------|------|
| E -> G | 546,081 | -33.27 | 0.81  | 0.83  | 9.81  | 1.12 |
| E -> H | 546,081 | -7.48  | 0.29  | 0.31  | 56.00 | 0.76 |
| E -> I | 546,081 | -7.66  | 0.17  | 0.31  | 23.60 | 1.00 |
| E -> L | 546,081 | -8.56  | -0.18 | -0.15 | 16.87 | 0.79 |
| E -> K | 546,081 | -9.79  | -0.07 | 0.11  | 22.53 | 1.02 |
| E -> M | 546,081 | -8.65  | -0.27 | -0.25 | 12.80 | 0.84 |
| E -> F | 546,081 | -7.30  | -0.12 | 0.11  | 50.50 | 1.54 |
| E -> P | 546,081 | -10.15 | 1.90  | 1.89  | 27.34 | 2.08 |
| E -> S | 546,081 | -16.40 | 0.47  | 0.58  | 8.72  | 0.89 |
| E -> T | 546,081 | -13.04 | 0.57  | 0.69  | 19.00 | 0.88 |
| E -> W | 546,081 | -5.46  | 0.05  | 0.42  | 61.02 | 2.19 |
| E -> Y | 546,081 | -7.12  | -0.03 | 0.30  | 44.66 | 1.92 |
| E -> V | 546,081 | -10.32 | 0.49  | 0.66  | 37.89 | 0.89 |

| <b>Mutation</b> | <b>N</b> | <b>Min</b> | <b>Median</b> | <b>Mean</b> | <b>Max</b> | <b>SD</b> |
|-----------------|----------|------------|---------------|-------------|------------|-----------|
| G -> A          | 479,056  | -2.82      | 2.12          | 1.90        | 20.76      | 2.05      |
| G -> R          | 479,056  | -5.90      | 1.91          | 3.75        | 72.22      | 7.23      |
| G -> N          | 479,056  | -4.76      | 2.10          | 3.11        | 49.29      | 4.86      |
| G -> D          | 479,056  | -7.01      | 2.37          | 3.43        | 50.64      | 5.15      |
| G -> C          | 479,056  | -6.00      | 2.36          | 2.51        | 31.73      | 2.92      |
| G -> Q          | 479,056  | -4.51      | 2.31          | 3.39        | 58.20      | 5.61      |
| G -> E          | 479,056  | -5.00      | 2.47          | 3.61        | 52.90      | 5.76      |
| G -> H          | 479,056  | -3.79      | 2.47          | 3.37        | 105.82     | 5.41      |
| G -> I          | 479,056  | -6.08      | 3.59          | 4.52        | 56.48      | 5.92      |
| G -> L          | 479,056  | -5.48      | 2.26          | 3.35        | 56.92      | 5.69      |
| G -> K          | 479,056  | -4.61      | 2.04          | 3.40        | 61.33      | 6.08      |
| G -> M          | 479,056  | -5.69      | 2.05          | 2.77        | 51.76      | 4.68      |
| G -> F          | 479,056  | -5.92      | 2.31          | 5.09        | 97.75      | 10.27     |
| G -> P          | 479,056  | -5.49      | 5.31          | 5.01        | 49.18      | 4.29      |
| G -> S          | 479,056  | -2.90      | 2.06          | 2.32        | 29.09      | 2.77      |
| G -> T          | 479,056  | -4.02      | 3.11          | 3.76        | 41.32      | 4.38      |
| G -> W          | 479,056  | -6.07      | 2.57          | 6.59        | 116.63     | 13.62     |
| G -> Y          | 479,056  | -6.57      | 2.43          | 5.60        | 105.19     | 11.37     |
| G -> V          | 479,056  | -5.36      | 3.65          | 4.13        | 46.69      | 4.67      |

| <b>Mutation</b> | <b>N</b> | <b>Min</b> | <b>Median</b> | <b>Mean</b> | <b>Max</b> | <b>SD</b> |
|-----------------|----------|------------|---------------|-------------|------------|-----------|
| H -> A          | 195,650  | -69.93     | 0.36          | 0.66        | 89.98      | 6.85      |
| H -> R          | 195,650  | -71.06     | -0.11         | 0.47        | 97.17      | 6.99      |
| H -> N          | 195,650  | -70.08     | 0.23          | 0.60        | 90.59      | 6.86      |
| H -> D          | 195,650  | -70.17     | 0.66          | 1.11        | 92.29      | 6.93      |
| H -> C          | 195,650  | -70.21     | 0.42          | 0.75        | 90.61      | 6.84      |
| G -> Q          | 195,650  | -70.91     | 0.04          | 0.45        | 90.57      | 6.86      |
| H -> E          | 195,650  | -69.92     | 0.32          | 0.78        | 90.41      | 6.90      |
| H -> G          | 195,650  | -69.66     | 0.92          | 1.22        | 91.48      | 6.91      |
| H -> I          | 195,650  | -71.38     | 0.21          | 0.62        | 91.98      | 6.93      |
| H -> L          | 195,650  | -71.51     | -0.33         | -0.17       | 90.03      | 6.87      |
| H -> K          | 195,650  | -70.89     | -0.18         | 0.20        | 90.26      | 6.87      |

|        |         |        |       |       |        |      |
|--------|---------|--------|-------|-------|--------|------|
| H -> M | 195,650 | -71.9  | -0.50 | -0.34 | 89.94  | 6.87 |
| H -> F | 195,650 | -71.90 | -0.39 | -0.15 | 90.87  | 6.91 |
| H -> P | 195,650 | -70.87 | 2.61  | 2.57  | 94.28  | 7.21 |
| H -> S | 195,650 | -69.80 | 0.48  | 0.87  | 90.33  | 6.86 |
| H -> T | 195,650 | -69.92 | 0.58  | 0.98  | 90.60  | 6.88 |
| H -> W | 195,650 | -70.51 | -0.11 | 0.69  | 105.05 | 7.31 |
| H -> Y | 195,650 | -71.16 | -0.23 | 0.30  | 94.39  | 7.04 |
| H -> V | 195,650 | -71.04 | 0.51  | 0.90  | 91.16  | 6.88 |

| <b>Mutation</b> | <b>N</b> | <b>Min</b> | <b>Median</b> | <b>Mean</b> | <b>Max</b> | <b>SD</b> |
|-----------------|----------|------------|---------------|-------------|------------|-----------|
| I -> A          | 288,358  | -19.07     | 2.02          | 2.04        | 6.89       | 1.58      |
| I -> R          | 288,358  | -8.33      | 1.43          | 2.82        | 44.23      | 3.53      |
| I -> N          | 288,358  | -9.74      | 2.03          | 2.06        | 14.75      | 1.61      |
| I -> D          | 288,358  | -10.18     | 2.80          | 2.86        | 15.66      | 2.22      |
| I -> C          | 288,358  | -11.53     | 1.88          | 1.90        | 9.70       | 1.27      |
| I -> Q          | 288,358  | -9.02      | 1.61          | 1.78        | 14.26      | 1.61      |
| I -> E          | 288,358  | -8.47      | 2.10          | 2.40        | 13.63      | 2.11      |
| I -> G          | 288,358  | -38.01     | 3.06          | 3.01        | 8.68       | 1.75      |
| I -> H          | 288,358  | -8.47      | 1.62          | 2.01        | 59.68      | 1.74      |
| I -> L          | 288,358  | -8.31      | 0.06          | 0.18        | 18.24      | 0.63      |
| I -> K          | 288,358  | -8.54      | 1.20          | 1.87        | 22.55      | 2.10      |
| I -> M          | 288,358  | -9.01      | 0.05          | 0.17        | 14.36      | 0.73      |
| I -> F          | 288,358  | -7.88      | 0.83          | 2.59        | 56.71      | 3.84      |
| I -> P          | 288,358  | -3.94      | 3.95          | 3.77        | 19.81      | 2.46      |
| I -> S          | 288,358  | -12.00     | 2.49          | 2.53        | 10.12      | 1.88      |
| I -> T          | 288,358  | -5.81      | 1.73          | 1.75        | 6.29       | 1.30      |
| I -> W          | 288,358  | -7.76      | 1.54          | 5.09        | 68.56      | 7.02      |
| I -> Y          | 288,358  | -7.82      | 1.23          | 3.94        | 60.89      | 5.45      |
| I -> V          | 288,358  | -3.35      | 0.81          | 0.80        | 5.84       | 0.46      |

| <b>Mutation</b> | <b>N</b> | <b>Min</b> | <b>Median</b> | <b>Mean</b> | <b>Max</b> | <b>SD</b> |
|-----------------|----------|------------|---------------|-------------|------------|-----------|
| L -> A          | 687,525  | -15.40     | 1.67          | 1.90        | 6.74       | 1.53      |
| L -> R          | 687,525  | -4.02      | 1.13          | 2.27        | 47.28      | 3.00      |
| L -> N          | 687,525  | -4.69      | 1.73          | 1.85        | 11.75      | 1.58      |
| L -> D          | 687,525  | -5.71      | 2.34          | 2.64        | 11.21      | 2.19      |
| L -> C          | 687,525  | -10.43     | 1.81          | 1.89        | 7.32       | 1.31      |
| L -> Q          | 687,525  | -4.77      | 1.35          | 1.55        | 12.58      | 1.43      |
| L -> E          | 687,525  | -4.91      | 1.70          | 2.16        | 12.71      | 1.98      |
| L -> G          | 687,525  | -28.59     | 2.61          | 2.74        | 8.76       | 2.17      |
| L -> H          | 687,525  | -4.07      | 1.46          | 1.84        | 56.83      | 1.63      |
| L -> I          | 687,525  | -4.99      | 0.78          | 1.11        | 37.24      | 1.13      |
| L -> K          | 687,525  | -4.72      | 0.93          | 1.55        | 14.25      | 1.77      |
| L -> M          | 687,525  | -4.71      | -0.01         | 0.06        | 11.34      | 0.48      |
| L -> F          | 687,525  | -3.36      | 0.44          | 1.59        | 59.52      | 2.73      |
| L -> P          | 687,525  | -5.84      | 3.97          | 3.91        | 25.50      | 2.72      |
| L -> S          | 687,525  | -11.16     | 2.07          | 2.28        | 7.96       | 1.87      |
| L -> T          | 687,525  | -4.10      | 1.91          | 2.03        | 26.20      | 1.46      |

|        |         |       |      |      |       |      |
|--------|---------|-------|------|------|-------|------|
| L -> W | 687,525 | -4.22 | 0.98 | 3.69 | 94.86 | 5.63 |
| L -> Y | 687,525 | -3.56 | 0.77 | 2.87 | 67.78 | 4.36 |
| L -> V | 687,525 | -5.23 | 1.48 | 1.66 | 27.57 | 1.12 |

| <b>Mutation</b> | <b>N</b> | <b>Min</b> | <b>Median</b> | <b>Mean</b> | <b>Max</b> | <b>SD</b> |
|-----------------|----------|------------|---------------|-------------|------------|-----------|
| K -> A          | 443,672  | -9.20      | 0.50          | 0.58        | 6.38       | 0.64      |
| K -> R          | 443,672  | -4.91      | 0.05          | 0.04        | 14.88      | 0.56      |
| K -> N          | 443,672  | -5.84      | 0.46          | 0.57        | 7.24       | 0.76      |
| K -> D          | 443,672  | -6.11      | 0.79          | 1.00        | 11.84      | 1.18      |
| K -> C          | 443,672  | -8.31      | 0.71          | 0.77        | 6.53       | 0.60      |
| K -> Q          | 443,672  | -7.25      | 0.21          | 0.31        | 7.39       | 0.57      |
| K -> E          | 443,672  | -4.88      | 0.46          | 0.63        | 11.52      | 0.98      |
| K -> G          | 443,672  | -14.87     | 1.02          | 1.04        | 8.01       | 1.09      |
| K -> H          | 443,672  | -3.82      | 0.51          | 0.49        | 61.28      | 0.67      |
| K -> I          | 443,672  | -4.16      | 0.39          | 0.63        | 35.30      | 0.98      |
| K -> L          | 443,672  | -4.84      | 0.01          | 0.01        | 7.98       | 0.54      |
| K -> M          | 443,672  | -4.90      | -0.09         | -0.07       | 6.06       | 0.59      |
| K -> F          | 443,672  | -4.69      | 0.07          | 0.29        | 52.06      | 1.32      |
| K -> P          | 443,672  | -5.85      | 2.52          | 2.37        | 26.23      | 2.25      |
| K -> S          | 443,672  | -8.77      | 0.62          | 0.74        | 7.38       | 0.79      |
| K -> T          | 443,672  | -3.98      | 0.80          | 0.93        | 27.81      | 0.83      |
| K -> W          | 443,672  | -4.12      | 0.26          | 0.59        | 66.18      | 1.67      |
| K -> Y          | 443,672  | -4.59      | 0.16          | 0.44        | 54.17      | 1.64      |
| K -> V          | 443,672  | -3.82      | 0.75          | 0.94        | 31.87      | 0.80      |

| <b>Mutation</b> | <b>N</b> | <b>Min</b> | <b>Median</b> | <b>Mean</b> | <b>Max</b> | <b>SD</b> |
|-----------------|----------|------------|---------------|-------------|------------|-----------|
| M -> A          | 150,890  | -8.70      | 1.24          | 1.56        | 5.95       | 1.36      |
| M -> R          | 150,890  | -3.21      | 0.82          | 1.59        | 39.50      | 2.26      |
| M -> N          | 150,890  | -3.00      | 1.27          | 1.61        | 12.86      | 1.55      |
| M -> D          | 150,890  | -5.62      | 1.68          | 2.22        | 11.15      | 2.10      |
| M -> C          | 150,890  | -4.82      | 1.49          | 1.58        | 6.70       | 1.24      |
| M -> Q          | 150,890  | -3.03      | 0.95          | 1.27        | 13.50      | 1.31      |
| M -> E          | 150,890  | -3.45      | 1.16          | 1.76        | 13.23      | 1.81      |
| M -> G          | 150,890  | -12.93     | 2.04          | 2.25        | 8.14       | 1.98      |
| M -> H          | 150,890  | -2.66      | 1.16          | 1.54        | 71.11      | 1.57      |
| M -> I          | 150,890  | -2.82      | 0.76          | 1.09        | 21.92      | 1.13      |
| M -> L          | 150,890  | -3.74      | 0.19          | 0.28        | 18.50      | 0.54      |
| M -> K          | 150,890  | -3.83      | 0.65          | 1.12        | 17.30      | 1.39      |
| M -> F          | 150,890  | -2.79      | 0.42          | 1.67        | 63.30      | 3.19      |
| M -> P          | 150,890  | -4.23      | 3.65          | 3.54        | 22.17      | 2.74      |
| M -> S          | 150,890  | -5.76      | 1.48          | 1.84        | 6.88       | 1.66      |
| M -> T          | 150,890  | -2.55      | 1.58          | 1.76        | 17.05      | 1.41      |
| M -> W          | 150,890  | -3.47      | 0.66          | 2.97        | 63.02      | 5.14      |
| M -> Y          | 150,890  | -2.86      | 0.63          | 2.58        | 60.99      | 4.54      |
| K -> V          | 150,890  | -2.63      | 1.34          | 1.54        | 17.09      | 1.15      |



| <b>Mutation</b> | <b>N</b> | <b>Min</b> | <b>Median</b> | <b>Mean</b> | <b>Max</b> | <b>SD</b> |
|-----------------|----------|------------|---------------|-------------|------------|-----------|
| F -> A          | 243,115  | -17.81     | 2.78          | 2.65        | 7.82       | 1.83      |
| F -> R          | 243,115  | -6.89      | 2.32          | 2.63        | 42.64      | 2.48      |
| F -> N          | 243,115  | -10.81     | 2.89          | 2.66        | 7.89       | 1.93      |
| F -> D          | 243,115  | -11.82     | 3.70          | 3.42        | 15.90      | 2.47      |
| F -> C          | 243,115  | -15.12     | 2.73          | 2.59        | 8.13       | 1.67      |
| F -> Q          | 243,115  | -9.97      | 2.52          | 2.39        | 12.01      | 1.84      |
| F -> E          | 243,115  | -10.29     | 3.03          | 2.98        | 9.80       | 2.29      |
| F -> G          | 243,115  | -18.09     | 3.78          | 3.51        | 9.51       | 2.37      |
| F -> H          | 243,115  | -10.29     | 2.30          | 2.44        | 7.33       | 1.79      |
| F -> I          | 243,115  | -7.69      | 1.91          | 2.11        | 22.15      | 1.69      |
| F -> L          | 243,115  | -9.17      | 0.90          | 1.02        | 9.06       | 0.99      |
| F -> K          | 243,115  | -7.88      | 2.07          | 2.16        | 31.35      | 1.86      |
| F -> M          | 243,115  | -15.07     | 0.63          | 0.64        | 9.94       | 0.69      |
| F -> P          | 243,115  | -13.37     | 4.59          | 4.60        | 19.47      | 3.00      |
| F -> S          | 243,115  | -15.27     | 3.13          | 3.01        | 8.87       | 2.13      |
| F -> T          | 243,115  | -10.59     | 2.95          | 2.84        | 12.85      | 1.88      |
| F -> W          | 243,115  | -4.22      | 0.94          | 1.72        | 61.29      | 2.36      |
| F -> Y          | 243,115  | -5.73      | 0.50          | 0.80        | 53.95      | 1.03      |
| F -> V          | 243,115  | -10.61     | 2.42          | 2.46        | 14.16      | 1.57      |

| <b>Mutation</b> | <b>N</b> | <b>Min</b> | <b>Median</b> | <b>Mean</b> | <b>Max</b> | <b>SD</b> |
|-----------------|----------|------------|---------------|-------------|------------|-----------|
| P -> A          | 473,592  | -12.14     | 0.90          | 0.93        | 8.73       | 1.24      |
| P -> R          | 473,592  | -12.74     | 0.63          | 1.15        | 75.06      | 3.18      |
| P -> N          | 473,592  | -12.52     | 0.90          | 1.02        | 29.74      | 1.88      |
| P -> D          | 473,592  | -12.94     | 0.80          | 1.02        | 30.51      | 2.01      |
| P -> C          | 473,592  | -12.50     | 1.00          | 1.02        | 18.36      | 1.51      |
| P -> Q          | 473,592  | -12.83     | 0.70          | 0.90        | 45.42      | 2.02      |
| P -> E          | 473,592  | -12.66     | 0.58          | 0.84        | 42.58      | 2.00      |
| P -> G          | 473,592  | -12.40     | 1.02          | 1.10        | 7.58       | 1.75      |
| P -> H          | 473,592  | -12.66     | 0.77          | 0.96        | 97.74      | 1.88      |
| P -> I          | 473,592  | -11.92     | 0.94          | 1.08        | 35.50      | 1.73      |
| P -> L          | 473,592  | -12.76     | 0.68          | 0.81        | 37.87      | 1.82      |
| P -> K          | 473,592  | -12.81     | 0.65          | 0.95        | 51.12      | 2.46      |
| P -> M          | 473,592  | -12.70     | 0.64          | 0.72        | 38.43      | 1.65      |
| P -> F          | 473,592  | -12.69     | 0.64          | 1.39        | 66.33      | 3.91      |
| P -> S          | 473,592  | -12.87     | 0.94          | 1.01        | 15.10      | 1.63      |
| P -> T          | 473,592  | -12.01     | 1.06          | 1.19        | 29.63      | 1.72      |
| P -> W          | 473,592  | -12.47     | 0.75          | 2.00        | 110.26     | 5.82      |
| P -> Y          | 473,592  | -12.69     | 0.71          | 1.67        | 83.84      | 4.69      |
| P -> V          | 473,592  | -11.87     | 1.12          | 1.16        | 31.75      | 1.48      |

| <b>Mutation</b> | <b>N</b> | <b>Min</b> | <b>Median</b> | <b>Mean</b> | <b>Max</b> | <b>SD</b> |
|-----------------|----------|------------|---------------|-------------|------------|-----------|
| S -> A          | 602,870  | -4.75      | -0.01         | 0.07        | 4.31       | 0.69      |
| S -> R          | 602,870  | -5.83      | -0.24         | 0.43        | 50.00      | 3.03      |
| S -> N          | 602,870  | -4.00      | -0.01         | 0.29        | 18.90      | 1.34      |
| S -> D          | 602,870  | -6.41      | 0.12          | 0.49        | 21.57      | 1.67      |

|        |         |        |       |       |       |      |
|--------|---------|--------|-------|-------|-------|------|
| S -> C | 602,870 | -6.95  | 0.09  | 0.25  | 7.32  | 0.70 |
| S -> Q | 602,870 | -3.87  | -0.15 | 0.31  | 29.12 | 1.82 |
| S -> E | 602,870 | -6.17  | -0.04 | 0.43  | 35.08 | 1.99 |
| S -> G | 602,870 | -12.68 | 0.29  | 0.29  | 5.25  | 0.98 |
| S -> H | 602,870 | -4.10  | 0.10  | 0.35  | 82.87 | 1.66 |
| S -> I | 602,870 | -5.88  | 0.26  | 0.66  | 41.70 | 1.60 |
| S -> L | 602,870 | -6.04  | -0.18 | 0.09  | 24.45 | 1.62 |
| S -> K | 602,870 | -4.88  | -0.24 | 0.27  | 39.81 | 2.18 |
| S -> M | 602,870 | -6.00  | -0.29 | -0.13 | 22.86 | 1.50 |
| S -> F | 602,870 | -6.41  | -0.18 | 0.88  | 66.38 | 4.36 |
| S -> P | 602,870 | -5.74  | 1.90  | 1.84  | 39.19 | 2.40 |
| S -> T | 602,870 | -3.39  | 0.26  | 0.50  | 27.75 | 0.96 |
| S -> W | 602,870 | -6.07  | 0.00  | 1.72  | 80.88 | 6.57 |
| S -> Y | 602,870 | -5.47  | -0.11 | 1.22  | 69.93 | 5.22 |
| S -> V | 602,870 | -4.81  | 0.48  | 0.74  | 32.32 | 1.22 |

| Mutation | N       | Min    | Median | Mean  | Max   | SD   |
|----------|---------|--------|--------|-------|-------|------|
| T -> A   | 367,715 | -8.36  | 0.15   | 0.26  | 6.49  | 0.81 |
| T -> R   | 367,715 | -5.65  | -0.18  | 0.55  | 42.29 | 2.76 |
| T -> N   | 367,715 | -4.66  | 0.11   | 0.34  | 18.40 | 1.03 |
| T -> D   | 367,715 | -6.71  | 0.31   | 0.69  | 17.52 | 1.52 |
| T -> C   | 367,715 | -6.15  | 0.20   | 0.35  | 12.15 | 0.73 |
| T -> Q   | 367,715 | -4.70  | -0.08  | 0.30  | 17.66 | 1.41 |
| T -> E   | 367,715 | -5.75  | 0.06   | 0.54  | 19.16 | 1.68 |
| T -> G   | 367,715 | -10.48 | 0.55   | 0.71  | 8.03  | 1.22 |
| T -> H   | 367,715 | -4.64  | 0.11   | 0.34  | 64.18 | 1.27 |
| T -> I   | 367,715 | -4.93  | -0.07  | 0.05  | 13.42 | 1.16 |
| T -> L   | 367,715 | -8.72  | -0.28  | -0.22 | 18.86 | 1.10 |
| T -> K   | 367,715 | -4.98  | -0.21  | 0.27  | 26.35 | 1.83 |
| T -> M   | 367,715 | -5.33  | -0.37  | -0.29 | 23.33 | 1.16 |
| T -> F   | 367,715 | -6.10  | -0.19  | 0.81  | 47.25 | 3.54 |
| T -> P   | 367,715 | -10.94 | 1.88   | 1.84  | 28.18 | 2.25 |
| T -> S   | 367,715 | -6.30  | 0.21   | 0.34  | 12.91 | 0.77 |
| T -> W   | 367,715 | -5.32  | 0.03   | 1.85  | 68.73 | 5.86 |
| T -> Y   | 367,715 | -5.24  | -0.10  | 1.29  | 58.07 | 4.58 |
| T -> V   | 367,715 | -4.31  | 0.11   | 0.23  | 9.93  | 0.87 |

| Mutation | N      | Min    | Median | Mean | Max   | SD   |
|----------|--------|--------|--------|------|-------|------|
| W -> A   | 79,980 | -20.50 | 2.49   | 2.63 | 9.04  | 2.11 |
| W -> R   | 79,980 | -13.52 | 2.12   | 2.35 | 40.6  | 2.27 |
| W -> N   | 79,980 | -20.10 | 2.64   | 2.71 | 9.64  | 2.24 |
| W -> D   | 79,980 | -17.26 | 3.24   | 3.30 | 11.02 | 2.72 |
| W -> C   | 79,980 | -21.24 | 2.56   | 2.68 | 9.13  | 2.01 |
| W -> Q   | 79,980 | -18.94 | 2.32   | 2.41 | 9.78  | 2.11 |
| W -> E   | 79,980 | -16.67 | 2.67   | 2.87 | 10.34 | 2.51 |
| W -> G   | 79,980 | -21.21 | 3.43   | 3.45 | 10.40 | 2.59 |
| W -> H   | 79,980 | -17.26 | 2.13   | 2.44 | 9.04  | 2.06 |

|        |        |        |      |      |       |      |
|--------|--------|--------|------|------|-------|------|
| W -> I | 79,980 | -18.21 | 1.86 | 2.19 | 21.14 | 1.97 |
| W -> L | 79,980 | -21.84 | 0.99 | 1.32 | 26.89 | 1.46 |
| W -> K | 79,980 | -15.91 | 1.96 | 2.21 | 52.96 | 2.14 |
| W -> M | 79,980 | -20.90 | 0.73 | 0.97 | 39.76 | 1.19 |
| W -> F | 79,980 | -12.42 | 0.51 | 0.80 | 32.07 | 1.23 |
| W -> P | 79,980 | -19.27 | 4.16 | 4.40 | 20.49 | 3.25 |
| W -> S | 79,980 | -20.87 | 2.93 | 3.01 | 9.71  | 2.39 |
| W -> T | 79,980 | -18.63 | 2.76 | 2.90 | 14.86 | 2.19 |
| W -> Y | 79,980 | -9.68  | 0.82 | 1.21 | 33.65 | 1.64 |
| W -> V | 79,980 | -18.73 | 2.30 | 2.53 | 15.94 | 1.89 |

| <b>Mutation</b> | <b>N</b> | <b>Min</b> | <b>Median</b> | <b>Mean</b> | <b>Max</b> | <b>SD</b> |
|-----------------|----------|------------|---------------|-------------|------------|-----------|
| Y -> A          | 182,982  | -27.99     | 1.97          | 2.14        | 8.70       | 1.64      |
| Y -> R          | 182,982  | -15.17     | 1.53          | 1.86        | 70.19      | 1.94      |
| Y -> N          | 182,982  | -19.50     | 2.00          | 2.16        | 8.76       | 1.76      |
| Y -> D          | 182,982  | -18.84     | 2.71          | 2.86        | 10.57      | 2.28      |
| Y -> C          | 182,982  | -22.0      | 2.03          | 2.14        | 8.24       | 1.51      |
| Y -> Q          | 182,982  | -17.14     | 1.77          | 1.94        | 21.26      | 1.70      |
| Y -> E          | 182,982  | -14.93     | 2.15          | 2.42        | 10.65      | 2.11      |
| Y -> G          | 182,982  | -45.17     | 2.97          | 2.99        | 10.78      | 2.13      |
| Y -> H          | 182,982  | -18.37     | 1.66          | 1.93        | 8.25       | 1.59      |
| Y -> I          | 182,982  | -16.20     | 1.38          | 1.76        | 22.81      | 1.66      |
| Y -> L          | 182,982  | -16.07     | 0.42          | 0.74        | 23.52      | 1.05      |
| Y -> K          | 182,982  | -14.61     | 1.29          | 1.58        | 23.41      | 1.57      |
| Y -> M          | 182,982  | -18.37     | 0.26          | 0.48        | 11.83      | 0.87      |
| Y -> F          | 182,982  | -4.89      | -0.06         | 0.03        | 20.19      | 0.61      |
| Y -> P          | 182,982  | -22.10     | 4.12          | 4.18        | 18.47      | 2.93      |
| Y -> S          | 182,982  | -23.20     | 2.46          | 2.54        | 9.50       | 1.93      |
| Y -> T          | 182,982  | -18.45     | 2.27          | 2.43        | 11.15      | 1.75      |
| Y -> W          | 182,982  | -3.78      | 0.45          | 1.07        | 72.25      | 1.89      |
| Y -> V          | 182,982  | -18.76     | 1.79          | 2.04        | 11.22      | 1.48      |

| <b>Mutation</b> | <b>N</b> | <b>Min</b> | <b>Median</b> | <b>Mean</b> | <b>Max</b> | <b>SD</b> |
|-----------------|----------|------------|---------------|-------------|------------|-----------|
| V -> A          | 405,338  | -9.43      | 0.94          | 1.19        | 8.46       | 1.32      |
| V -> R          | 405,338  | -5.75      | 0.42          | 2.49        | 53.31      | 4.37      |
| V -> N          | 405,338  | -7.43      | 0.99          | 1.33        | 14.91      | 1.51      |
| V -> D          | 405,338  | -9.38      | 1.44          | 2.02        | 16.24      | 2.12      |
| V -> C          | 405,338  | -14.27     | 0.91          | 1.08        | 9.76       | 1.01      |
| V -> Q          | 405,338  | -5.23      | 0.60          | 1.37        | 18.34      | 2.02      |
| V -> E          | 405,338  | -4.63      | 0.92          | 1.83        | 18.22      | 2.36      |
| V -> G          | 405,338  | -20.56     | 1.93          | 2.10        | 9.38       | 2.04      |
| V -> H          | 405,338  | -5.75      | 0.73          | 1.36        | 77.30      | 1.78      |
| V -> I          | 405,338  | -4.13      | -0.27         | -0.19       | 26.70      | 0.64      |
| V -> L          | 405,338  | -8.86      | -0.18         | 0.04        | 19.43      | 1.03      |
| V -> K          | 405,338  | -6.36      | 0.28          | 1.59        | 36.85      | 2.80      |
| V -> M          | 405,338  | -7.85      | -0.17         | 0.12        | 17.57      | 1.29      |
| V -> F          | 405,338  | -5.78      | 0.17          | 2.57        | 56.87      | 4.74      |

|        |         |        |      |      |       |      |
|--------|---------|--------|------|------|-------|------|
| V -> P | 405,338 | -12.30 | 2.87 | 2.82 | 26.72 | 2.37 |
| V -> S | 405,338 | -14.8  | 1.37 | 1.68 | 9.24  | 1.66 |
| V -> T | 405,338 | -4.96  | 0.71 | 0.93 | 11.88 | 1.04 |
| V -> W | 405,338 | -4.34  | 0.61 | 5.04 | 75.17 | 8.31 |
| V -> Y | 405,338 | -5.65  | 0.38 | 3.76 | 62.93 | 6.34 |
